# Supplementary material for: Heritability estimates of the position and number of facial hair whorls in Thoroughbred horses
Source: PubMed Central journal article supplement (PMC6582570; doi:10.1186/s13104-019-4386-x), 2019-06-18
Supplement: 13104_2019_4386_MOESM1_ESM.pdf [file 13104_2019_4386_MOESM1_ESM.pdf]

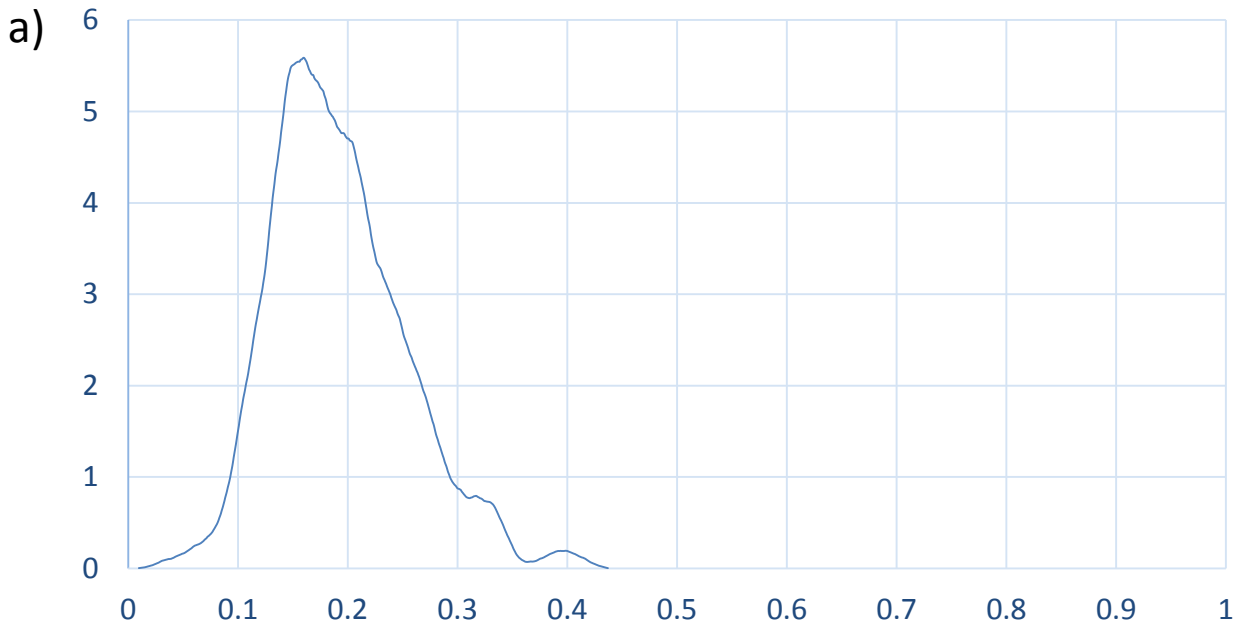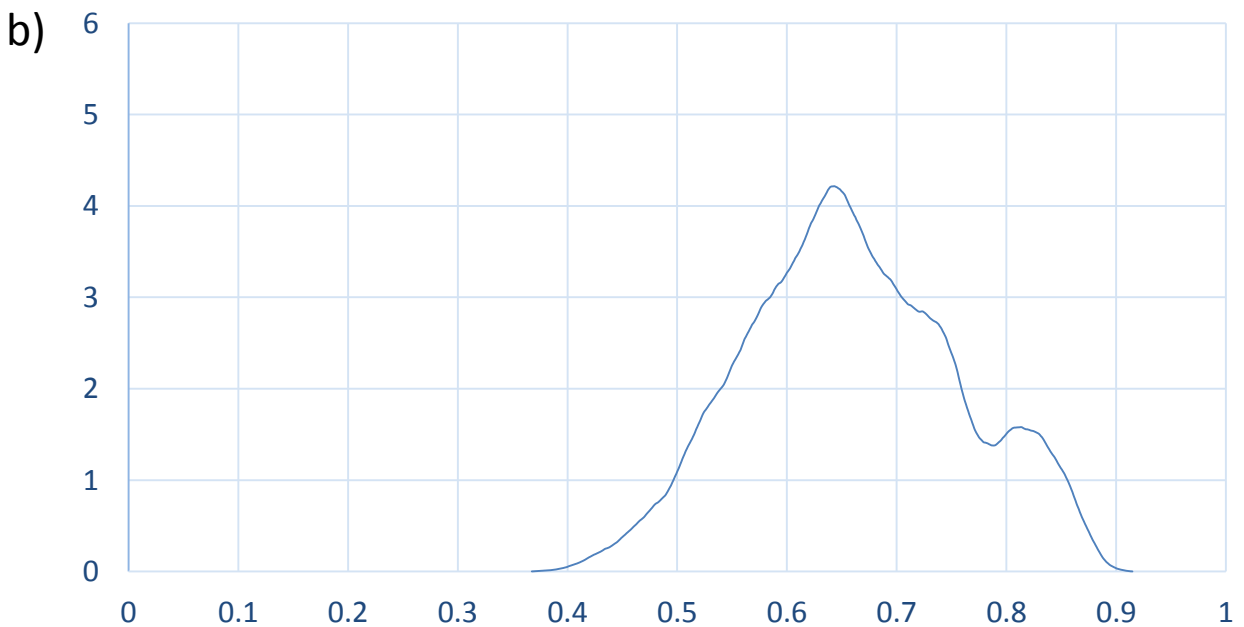

Figure S1. Posterior probabilities (distribution) of heritability estimates for number (a) and position (b) of hair whorls.

Horizontal axis: heritability values; vertical axis: posterior probability with corresponding heritability value.
